# Supplementary material
Source: HighWire-hosted journal article supplement (https://www.qdcxjkg.com/highwire/filestream/114169/field_highwire_adjunct_files/0/ERJ_01681-2013_Cuvelier.pdf)
Supplement: ERJ_01681-2013_Cuvelier.pdf [file ERJ_01681-2013_Cuvelier.pdf]

Votre visionneuse PDF actuelle ne permet pas d'afficher ce fichier dans son intégralité. Veuillez mettre à jour votre visionneuse.
